# Supplementary material
Source: PubMed Central journal article supplement (PMC2827643)
Supplement: NIHMS157964-supplement-1_si_001.pdf [file NIHMS157964-supplement-1_si_001.pdf]

***SUPPLEMENTARY MATERIAL***

**XPS and ToF-SIMS Investigation of  $\alpha$ -Helical and  $\beta$ -Strand Peptide  
Adsorption onto SAMs**

Julia S. Apte<sup>1</sup>, Galen Collier<sup>3</sup>, Robert A. Latour<sup>3</sup>, Lara J. Gamble<sup>2</sup> and David G. Castner<sup>1,2\*</sup>

National ESCA and Surface Analysis Center for Biomedical Problems

Departments of Chemical Engineering<sup>1</sup> and Bioengineering<sup>2</sup>,

University of Washington, Box 351750

Seattle, WA 98195-1750

Department of Bioengineering<sup>3</sup>

501 Rhodes Engineering Research Center

Clemson University

Clemson, SC 29634

\*Corresponding Author:

David G. Castner

206-543-8094 (phone)

206-543-3778 (fax)

castner@nb.engr.washington.edu

**Table S1:** PCA Scores for LK $\beta$ 15 adsorbed onto methyl and carboxyl SAMs. Percent variance for each PC is also shown. The letter in each sample name denotes the type of SAM (M for methyl and C for carboxyl). The number denotes the peptide adsorption concentration in mg/mL. Samples labeled M and C are the bare SAMs without adsorbed peptide.

| Samples   | PC 1 Scores | PC 2 Scores |
|-----------|-------------|-------------|
| C – 0.05  | -0.010      | 0.136       |
| C – 0.05  | 0.004       | 0.127       |
| C – 0.05  | 0.047       | 0.083       |
| C – 0.05  | -0.002      | 0.138       |
| C – 0.05  | 0.011       | 0.116       |
| C – 0.05  | -0.009      | 0.144       |
| C – 0.05  | -0.016      | 0.152       |
| C – 0.05  | -0.006      | 0.140       |
| C – 0.05  | -0.013      | 0.145       |
| C – 0.001 | 0.019       | 0.110       |
| C – 0.001 | 0.030       | 0.092       |
| C – 0.001 | 0.059       | 0.070       |
| C – 0.001 | 0.012       | 0.108       |
| C – 0.001 | 0.020       | 0.107       |
| C – 0.001 | 0.051       | 0.077       |
| C – 0.001 | 0.057       | 0.071       |
| C – 0.001 | 0.067       | 0.062       |
| C – 0.001 | 0.050       | 0.077       |
| C – 0.001 | 0.057       | 0.070       |
| C         | -0.272      | -0.029      |
| C         | -0.271      | -0.031      |
| C         | -0.255      | -0.025      |
| C         | -0.268      | -0.010      |
| C         | -0.267      | -0.011      |
| C         | -0.268      | -0.009      |
| M – 0.3   | 0.053       | -0.074      |
| M – 0.3   | 0.051       | -0.074      |
| M – 0.3   | 0.053       | -0.075      |
| M – 0.3   | 0.054       | -0.071      |
| M – 0.3   | 0.186       | -0.054      |
| M – 0.3   | 0.193       | -0.063      |
| M – 0.3   | 0.196       | -0.076      |
| M – 0.3   | 0.158       | -0.022      |
| M – 0.3   | 0.168       | -0.030      |
| M – 0.05  | 0.056       | -0.070      |
| M – 0.05  | 0.060       | -0.075      |
| M – 0.05  | 0.059       | -0.072      |
| M – 0.05  | 0.061       | -0.068      |
| M – 0.05  | 0.192       | -0.089      |
| M – 0.05  | 0.203       | -0.097      |

|                  |        |        |
|------------------|--------|--------|
| M - 0.05         | 0.196  | -0.096 |
| M - 0.05         | 0.209  | -0.105 |
| M - 0.05         | 0.206  | -0.105 |
| M                | -0.308 | -0.102 |
| M                | -0.301 | -0.100 |
| M                | -0.294 | -0.093 |
| M                | -0.107 | -0.095 |
| M                | -0.096 | -0.105 |
| M                | -0.073 | -0.100 |
| Percent Variance | 69     | 24     |

**Table S2:** PCA Loadings for LK $\beta$ 15 adsorbed onto methyl and carboxyl SAMs. The peak subset indicates whether the peak is from the lysine peak list (K), leucine peak list (L) or from both (B).

| Peak label                       | Peak subset | Peak mass | PC 1 Loadings | PC 2 Loadings |
|----------------------------------|-------------|-----------|---------------|---------------|
| NH <sub>3</sub>                  | K           | 17.0266   | -0.02         | 0.01          |
| NH <sub>4</sub>                  | K           | 18.0344   | -0.61         | -0.34         |
| CH <sub>2</sub> N                | K           | 28.0187   | -0.04         | 0.16          |
| CH <sub>4</sub> N                | K           | 30.0344   | 0.07          | 0.67          |
| CH <sub>5</sub> N                | K           | 31.0422   | -0.01         | 0.05          |
| C <sub>2</sub> H <sub>6</sub> N  | B           | 44.0500   | -0.25         | -0.16         |
| C <sub>2</sub> H <sub>7</sub> N  | K           | 45.0579   | -0.07         | -0.04         |
| C <sub>3</sub> H <sub>6</sub> N  | K           | 56.0500   | -0.11         | 0.04          |
| C <sub>5</sub> H <sub>10</sub> N | K           | 84.0813   | 0.61          | -0.58         |
| C <sub>5</sub> H <sub>12</sub> N | L           | 86.0970   | 0.42          | 0.19          |
